# Supplementary material
Source: MDPI journal article supplement (https://www.mdpi.com/2313-0105/9/8/404)
Supplement: s1 [file s1]

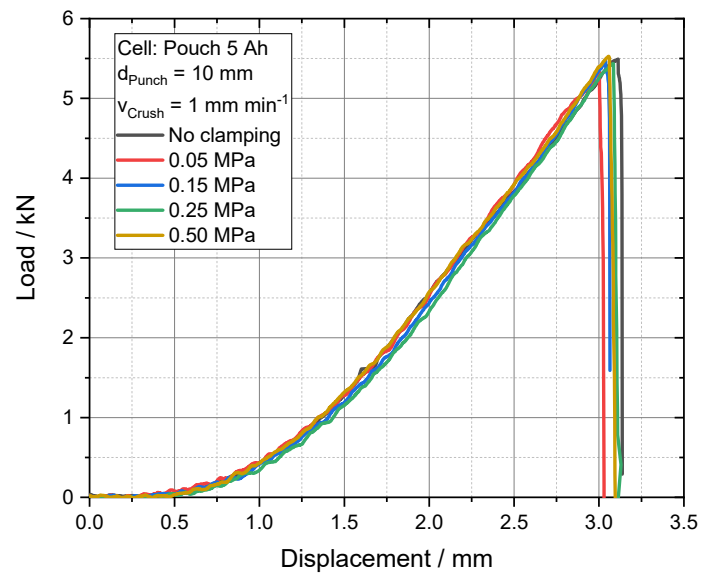

**Figure S1.** Example of selected force-displacement curves of crush tests during indentation with a 10 mm punch at a speed of 1 mm/min at different clamping normal stresses.

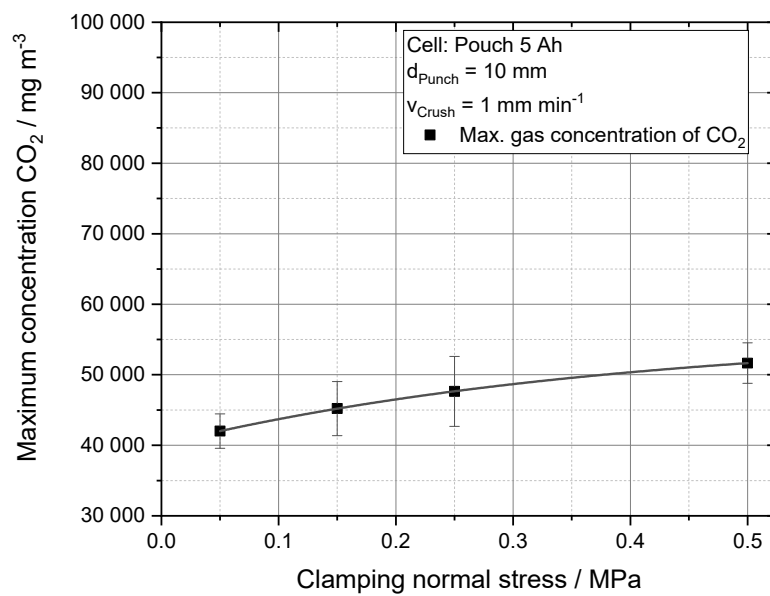

**Figure S2.** Asymptotic regression model fit of gas concentration peaks of CO<sub>2</sub> at different clamping normal stresses.

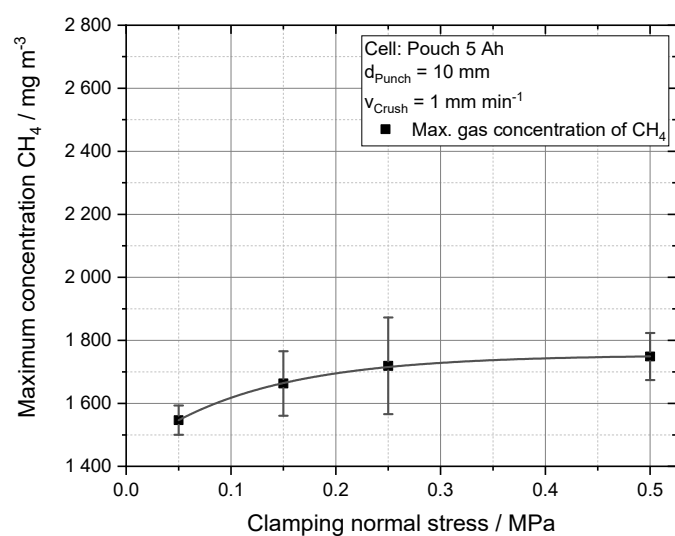

**Figure S3.** Asymptotic regression model fit of gas concentration peaks of  $\text{CH}_4$  at different clamping normal stresses.

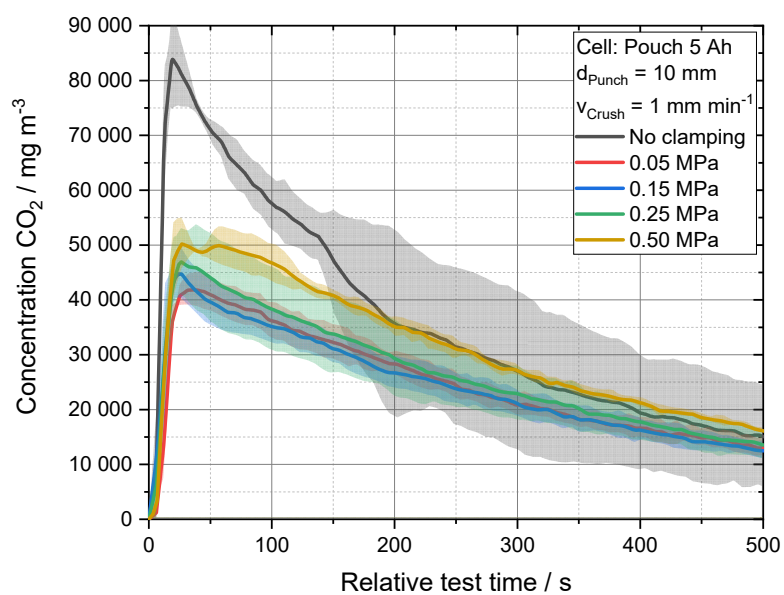

**Figure S4.** Gas concentration of  $\text{CO}_2$  versus time after the thermal runaway at different clamping normal stresses.

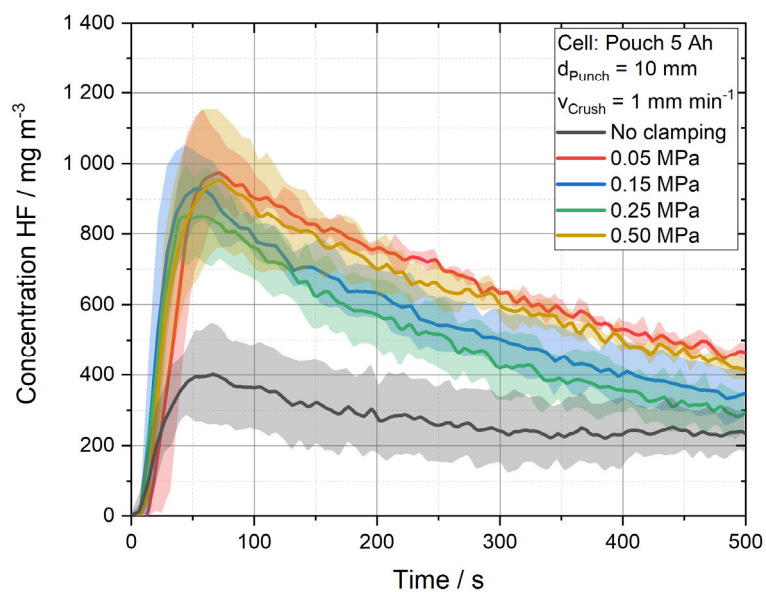

**Figure S5.** Gas concentration of HF versus time after the thermal runaway at different clamping normal stresses.

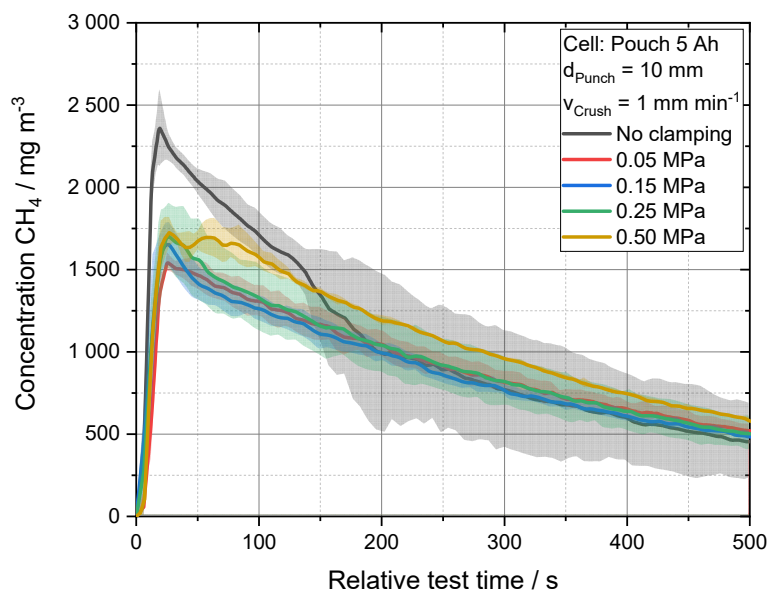

**Figure S6.** Gas concentration of  $\text{CH}_4$  versus time after the thermal runaway at different clamping normal stresses.

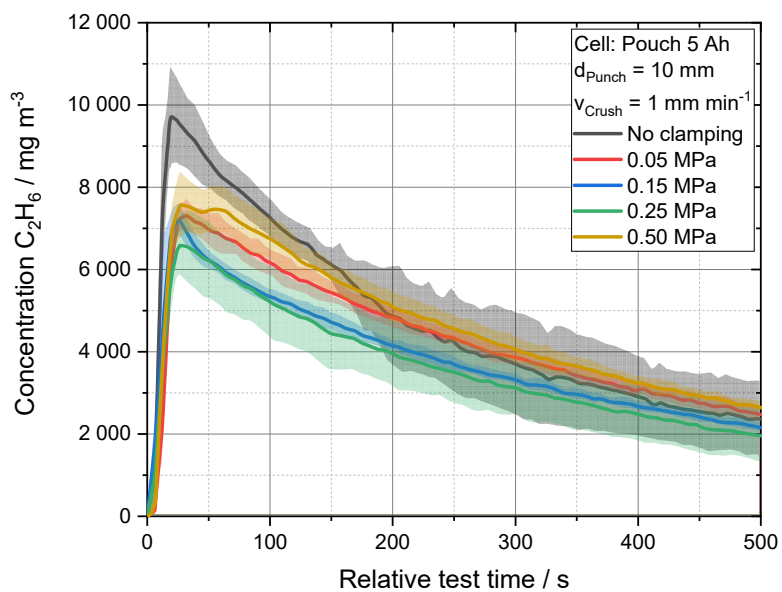

**Figure S7.** Gas concentration of  $C_2H_6$  versus time after the thermal runaway at different clamping normal stresses.

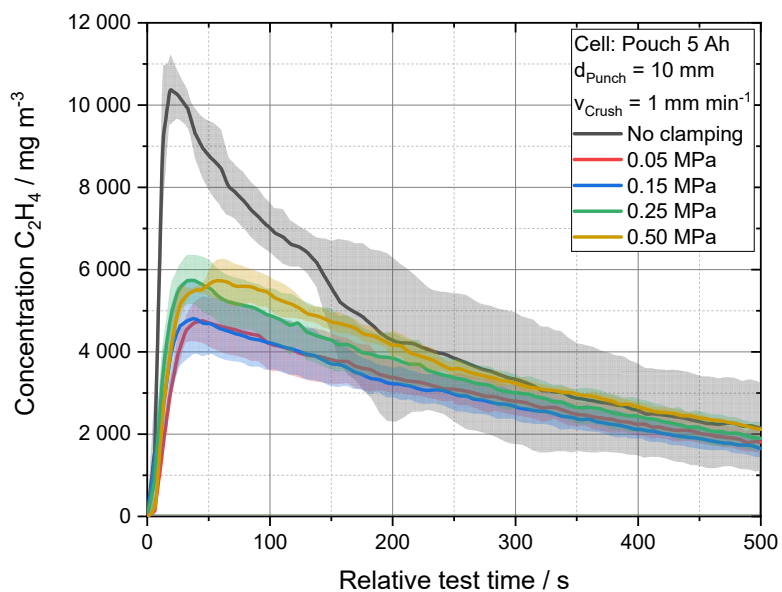

**Figure S8.** Gas concentration of  $C_2H_4$  versus time after the thermal runaway at different clamping normal stresses.

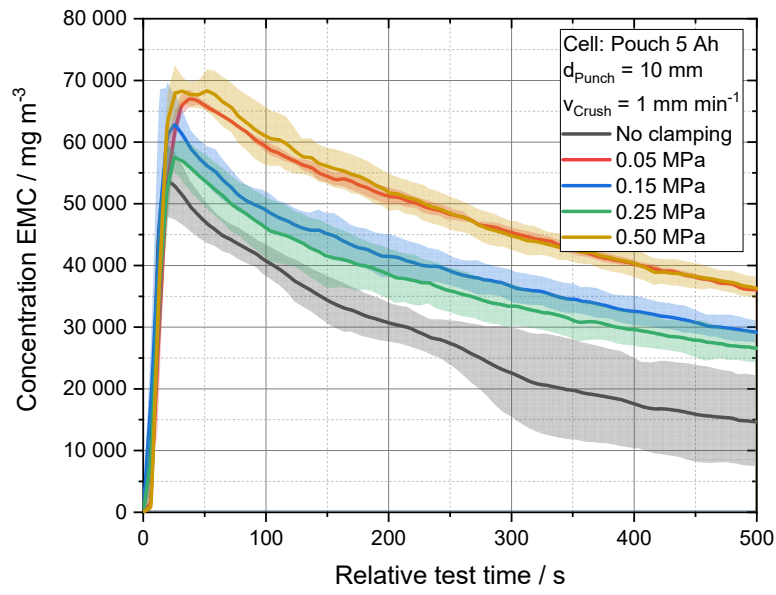

**Figure S9.** Gas concentration of EMC versus time after the thermal runaway at different clamping normal stresses.

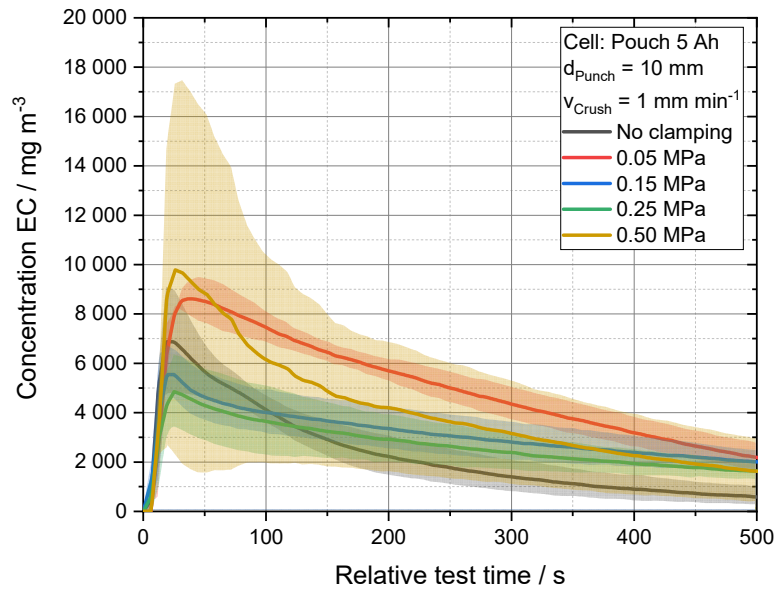

**Figure S10.** Gas concentration of EC versus time after the thermal runaway at different clamping normal stresses.
